# Supplementary material for: VERITAC-2: a Phase III study of vepdegestrant, a PROTAC ER degrader, versus fulvestrant in ER+/HER2- advanced breast cancer
Source: PubMed Central journal article supplement — Future Oncol. 2024 Jul 29;20(32):2447–55. doi: 10.1080/14796694.2024.2377530 (PMC11524203; doi:10.1080/14796694.2024.2377530), 2024-07-29
Supplement: IFON_A_2377530_SM0002.pdf [file IFON_A_2377530_SM0002.pdf]

# VERITAC-2: A Phase III Study of Vepdegestrant, a PROTAC ER Degradator, vs Fulvestrant in ER+/HER2- Advanced Breast Cancer

Erika P Hamilton, Cynthia Ma, Michelino De Laurentiis, Hiroji Iwata, Sara A Hurvitz, Seth Wander, Michael Danso, Dongrui R Lu, Julia Perkins Smith, Yuan Liu, Lana Tran, Sibyl Anderson, Mario Campone

URL: <https://www.tandfonline.com/doi/10.1080/14796694.2024.2377530>

Trial registration number: NCT05654623

## INTRODUCTION

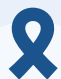

**The majority** of breast cancers are estrogen receptor positive/human epidermal growth factor receptor 2 negative (ER+/HER2-)

There is a high **unmet need** in the second-line setting for treatments with **distinct mechanisms of action**

### Vepdegestrant Mechanism of Action

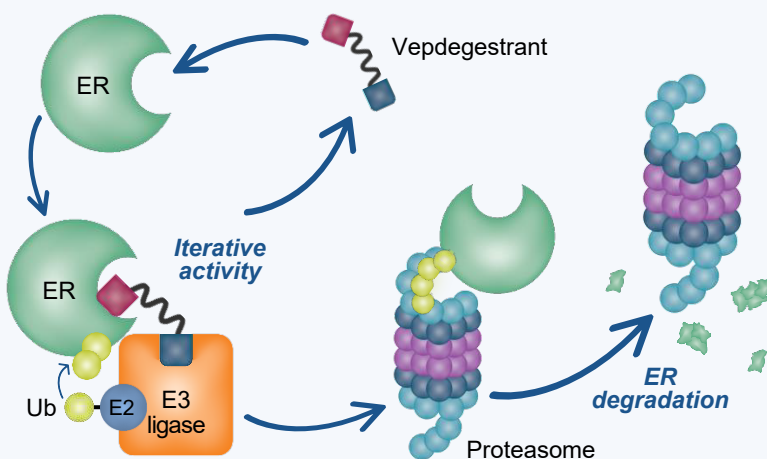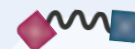

Vepdegestrant is an oral **PROTAC ER degrader** that degrades wild-type and clinically relevant mutants of ER in **ER+ breast cancer**

In a first-in-human phase I/II study, **vepdegestrant monotherapy** was **well tolerated** and **showed clinical activity** in heavily pretreated patients with ER+/HER2- advanced breast cancer

## VERITAC-2 STUDY DESIGN

VERITAC-2 is an open-label, randomized, global, multicenter, phase III study comparing the efficacy and safety of vepdegestrant and fulvestrant

### 28-Day Treatment Cycles

**≈560** patients

**>250** sites

**>25** countries

Previously treated adult patients with ER+/HER2- advanced breast cancer

Randomize 1:1

**Vepdegestrant**  
200 mg orally daily  
n≈280

**Fulvestrant**  
500 mg intramuscularly  
days 1 and 15 of cycle 1 and  
day 1 of subsequent cycles  
n≈280

### Stratification factors

- *ESR1* mutation (yes vs no)
- Visceral disease (yes vs no)

**Primary end point:** PFS in the overall population and *ESR1* mutant subpopulation  
**Secondary end points:** OS (key secondary), ORR, DOR, CBR, safety and tolerability, PK, PROs, circulating tumor biomarkers

## KEY INCLUSION CRITERIA

Confirmed ER+/HER2- recurrent or metastatic breast cancer

Radiological progression during or after the last line of therapy

1 prior line of CDK4/6 inhibitor + ET and ≤1 additional ET

Most recent ET regimen given for ≥6 months prior to disease progression

ECOG PS of 0 or 1
